# Supplementary material for: Orally administered Lactobacillus casei exhibited several probiotic properties in artificially suckling rabbits
Source: PubMed Central journal article supplement (PMC7322641; doi:10.5713/ajas.18.0973), 2019-04-15
Supplement: ajas-18-0973-suppl1.pdf [file ajas-18-0973-suppl1.pdf]

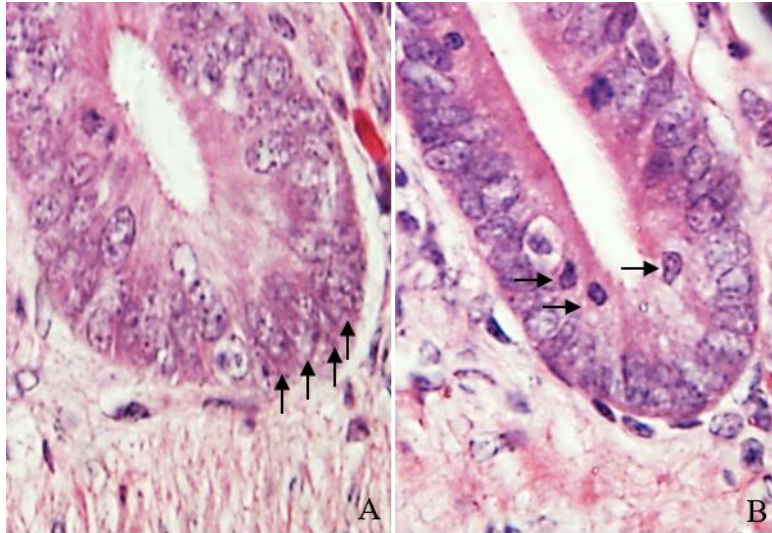

Supplementary Figure S1. Morphology of intestinal paneth cell and its degranulation ( $\times 1000$ )

Notes: The H&E stained crypts in jejunum of suckling rabbit. Arrowhead on A shows paneth cell that is not in state of degranulation, while arrowhead on B shows paneth cells that is in state of degranulation with clear large dark-colored vacuoles in their cytoplasm.
